# Supplementary material for: Rhus coriaria L. (Sumac) Demonstrates Oncostatic Activity in the Therapeutic and Preventive Model of Breast Carcinoma
Source: PubMed Central journal article supplement (PMC7795985; doi:10.3390/ijms22010183), 2020-12-26
Supplement: ijms-22-00183-s001.pdf [file ijms-22-00183-s001.pdf]

| Product Type       | Format                                                    | Reactions per Tube                                               |                                     |                                                                                                                                                                       |                | Sales Order Number |          |
|--------------------|-----------------------------------------------------------|------------------------------------------------------------------|-------------------------------------|-----------------------------------------------------------------------------------------------------------------------------------------------------------------------|----------------|--------------------|----------|
| PyroMark CpG Assay | Tube                                                      | 200 rxn                                                          |                                     |                                                                                                                                                                       |                | 3313126            |          |
| Assay No.          | Assay Name                                                | Gene Symbol                                                      | Amplicon Length                     | Sequence to Analyze                                                                                                                                                   | Number of CpGs | Lot No.            | Date     |
|                    | GeneGlobe Cat. no.                                        | Entrez Gene ID                                                   | Biotin Modification On              | Sequence to Analyze Bisulfite Converted                                                                                                                               |                |                    |          |
|                    | Chromosomal Location                                      | ENSEMBL Gene ID                                                  | Sequenced Strand                    | Dispensation Order                                                                                                                                                    |                |                    |          |
| 1                  | Rn_Npat_02_PM<br>PM00592487<br>Chr8:56996941-56997108     | Npat;Atm<br>315666;300711<br>ENSRNOG00000024934;ENSRNOG0000      | 167<br>Reverse Primer<br>Anti Sense | GCGACGGCCCTGGCGGAGTTGCCGGAGCGAGGTCGA<br>GYGAYGGTTTTGGGYGGAGTTGTGAGAGYAGGTYGA<br>TGTCGATCGTTGCGATGATGTCGAGTCGATGTCG                                                    | 6              | 269601604          | 06/06/18 |
| 2                  | Rn_Timp3_06_PM<br>PM00574896<br>Chr7:19726892-19727057    | Timp3<br>25358<br>ENSRNOG00000004303                             | 165<br>Reverse Primer<br>Sense      | CCCGCGGGATGTGACCAAGTGCCAAAGGGTGTCTGGCGCACGAGT<br>CCGCGGA<br>TTYGGYGGGATGTGATTAAGTGTTAAGGGTGTGGYGTAYGAGTTY<br>GYGGA<br>ATCGTCGAGTGATGATAGTAGTAGTCTGCTGTCGTATCGAGTCGTCG | 6              | 269601606          | 06/06/18 |
| 3                  | Rn_Pib2_08_PM<br>PM00519141<br>Chr2:226585653-226585846   | Pib2<br>54284<br>ENSRNOG00000010681                              | 193<br>Reverse Primer<br>Sense      | GGAAGCGCAGGCCGCGAGCCGGCTCCCGCCTCCCG<br>GGAAGYGTAGTYGAGTYGGTTTTYGTITTYG<br>TGAGTCGTCATGTCGTCGATAGTCGTTCCG                                                              | 6              | 269601608          | 06/06/18 |
| 4                  | Rn_Pten_03_PM<br>PM00450450<br>Chr1:236769789-236769907   | Pten<br>50557<br>ENSRNOG00000020723                              | 118<br>Reverse Primer<br>Sense      | GCGCTTGGCGTCCGGACGCGGCTGCGC<br>GYGTTTTGGGYGTYGGGAYGGTGYGT<br>TGTCGTCTGTCGATGATGTCGTCGTCG                                                                              | 6              | 269601610          | 06/06/18 |
| 5                  | Mm_Rassf1_G2_PM<br>PM00416297<br>Chr9:107454076-107454149 | Zmynd10;Rassf1<br>114602;56289<br>ENSMUSG00000010044;ENSMUSG0000 | 73<br>Reverse Primer<br>Sense       | CGCACAGTGTGCGA<br>YGTATAYGTGGTYGA<br>GTCGTCATATCGATGATGTCG                                                                                                            | 3              | 269601612          | 06/06/18 |
